# Supplementary material for: Patient and Program Level Correlates of 30-day Readmissions: A Retrospective Analysis of a Transitional Care Program
Source: Research Square preprint supplement (doi:10.21203/rs.3.rs-7365687/v1), 2025-09-11
Supplement: Supplementary file 1 [file ed9006f5c97eeeade0ac53bf.docx]

**Supplementary Material**

Appendix A. Description of Variables in the Dataset

eTable 1. Data Dictionary of Considered Variables

eTable 2. Missing Data

eTable 3. Patient and Program Correlates of 30-day Readmissions – Full Model

eTable 4. Patient and Program Correlates of 30-day Readmissions Including Contact Timing Categories

Appendix B. Simplified Model Including Contact Timing Categories

eTable 5. Cox Model for Time to Readmission

eTable 6. Descriptive Characteristics of Contacted vs. Not Contacted

Appendix C. Factors Associated with Time to Readmission

Appendix D. Stata Code

**APPENDIX A. Description of Variables in the Dataset**

**Age**

Patient’s age at the time of index discharge. Age identified in index hospitalization notes (EHR).

**Gender**

Patient’s gender, as indicated by EHR patient demographics data.

**Race**

Patient’s race, as indicated by EHR patient demographics data.

**Ethnicity**

Patient’s ethnicity, as indicated by EHR patient demographics data.

**Married**

Patient’s marital status, as indicated by EHR patient demographics data. Confirmed by examining index hospitalization notes. Social history notes from surrounding encounters considered to examine consistency or changes.

**Lives Alone**

Identified by examining index hospitalization notes, social history notes from surrounding encounters, and TCM patient outreach notes.

**Language**

Patient’s preferred language as indicated by EHR patient demographics data.

**Interpreter**

Need for interpreter services as indicated by EHR patient demographics data. If interpreter required, index hospitalization notes were examined to confirm.

**Current smoker**

Identified by examining the index hospitalization notes and social history notes from surrounding encounters. Reports of smoking leading up to and following discharge provided context for smoking.

**Alcohol abuse**

Identified by examining the index hospitalization notes and social history notes from surrounding encounters. Reports of heavy alcohol use leading up to and following discharge provided context for alcohol abuse.

**Substance Abuse**

Identified by examining the index hospitalization notes and social history notes from surrounding encounters. Reports of substance use leading up to and following discharge provided context for substance abuse.

**Dementia**

Identified if specified in patient health history, provider notes, progress notes, and/or other EHR notes prior to or during the index hospitalization. History of present illness during the index hospitalization was examined first. Dementia and other key search terms were used to search the EHR.

**Hypertension**

Identified if specified in patient health history, provider notes, progress notes, and/or other EHR notes prior to or during the index hospitalization. History of present illness during the index hospitalization was examined first. Hypertension and other key search terms were used to search the EHR.

**Diabetes**

Identified if specified in patient health history, provider notes, progress notes, and/or other EHR notes prior to or during the index hospitalization. History of present illness during the index hospitalization was examined first. Diabetes and other key search terms were used to search the EHR.

**Stroke**

Identified if specified in patient health history, provider notes, progress notes, and/or other EHR notes prior to or during the index hospitalization. History of present illness during the index hospitalization was examined first. Stroke and other key search terms were used to search the EHR.

**Cancer**

Identified if specified in patient health history, provider notes, progress notes, and/or other EHR notes prior to or during the index hospitalization. History of present illness during the index hospitalization was examined first. Cancer and other key search terms were used to search the EHR.

**Coronary Artery Disease**

Identified if specified in patient health history, provider notes, progress notes, and/or other EHR notes prior to or during the index hospitalization. History of present illness during the index hospitalization was examined first. Coronary artery disease and other key search terms were used to search the EHR.

**Peripheral Vascular Disease**

Identified if specified in patient health history, provider notes, progress notes, and/or other EHR notes prior to or during the index hospitalization. History of present illness during the index hospitalization was examined first. Peripheral vascular disease and other key search terms were used to search the EHR.

**Atrial fibrillation**

Identified if specified in patient health history, provider notes, progress notes, and/or other EHR notes prior to or during the index hospitalization. History of present illness during the index hospitalization was examined first. Atrial fibrillation and other key search terms were used to search the EHR.

**Asthma**

Identified if specified in patient health history, provider notes, progress notes, and/or other EHR notes prior to or during the index hospitalization. History of present illness during the index hospitalization was examined first. Asthma and other key search terms were used to search the EHR.

**COPD**

Identified if specified in patient health history, provider notes, progress notes, and/or other EHR notes prior to or during the index hospitalization. History of present illness during the index hospitalization was examined first. COPD and other key search terms were used to search the EHR.

**Chronic Kidney Disease**

Identified if specified in patient health history, provider notes, progress notes, and/or other EHR notes prior to or during the index hospitalization. History of present illness during the index hospitalization was examined first. Chronic Kidney Disease and other key search terms were used to search the EHR.

**Liver Disease**

Identified if specified in patient health history, provider notes, progress notes, and/or other EHR notes prior to or during the index hospitalization. History of present illness during the index hospitalization was examined first. Liver Disease and other key search terms were used to search the EHR.

**Anemia**

Identified if specified in patient health history, provider notes, progress notes, and/or other EHR notes prior to or during the index hospitalization. History of present illness during the index hospitalization was examined first. Anemia and other key search terms were used to search the EHR.

**Osteoarthritis**

Identified if specified in patient health history, provider notes, progress notes, and/or other notes in the EHR prior to or during the index hospitalization. History of present illness during the index hospitalization was examined first. Osteoarthritis and other key search terms were used to search the EHR.

**Depression**

Identified if specified in patient health history, provider notes, progress notes, and/or other notes in the EHR prior to or during the index hospitalization. History of present illness during the index hospitalization was examined first. Depression and other key search terms were used to search the EHR.

**Anxiety**

Identified if specified in patient health history, provider notes, progress notes, and/or other notes in the EHR prior to or during the index hospitalization. History of present illness during the index hospitalization was examined first. Anxiety and other key search terms were used to search the EHR.

**7-day follow-up**

Determined using the EHR patient encounters list, which provides a record of patient health service usage. 7-day follow-up counted if the patient attended a cardiology appointment within seven days of the date of index discharge.

**APP contact within 48 hours**

Determined using the EHR patient encounters list. APP contact identified if a physician, physician assistant, or nurse practitioner conducted a TCM call within two days of the date of index discharge.

**Contact**

Determined via TCM outreach notes. Contact was determined by APP or RN documentation of outreach.

**Number of TCM Outreaches**

Determined using the EHR patient encounters list. Identified by tallying all calls made by a TCM member to the patient within the 30-day window following date of index discharge.

**Remote Patient Monitoring**

Determined using the EHR patient encounters list. Examined all TCM outreach notes within the encounters. RPM counted if patient enrolled and successfully participating in the program; outreach notes must have specified enrollment and vitals must have been collected until patient was either readmitted or approximately 30-days lapsed.

**Community Paramedicine**

Determined using the Paramedicine patient visits records. Counted if greater than or equal to one visit by a paramedic following the patient’s discharge.

**Home Health Service**

Counted if patient receiving home health services prior to index hospitalization and demonstrates evidence of continuation or if provided with home health services through the transitional care team and receiving care following discharge. Indicated by social history notes prior to index hospitalization and TCM outreach notes following discharge.

**30-day readmission**

Determined using the EHR patient encounters list. 30-day readmission identified if patient admitted to the hospital within 30 days of the date of index discharge. Emergency department only visits excluded and planned admissions (e.g., elective procedures) excluded.

**Multiple readmissions**

Determined using the EHR patient encounters list. Identified if greater than or equal to two hospitalization encounters occurred within the same year following the index hospitalization.

| eTable 1. Data Dictionary of Considered Variables | | | |
| --- | --- | --- | --- |
| Variable | Description/Source | Column label | Values |
| Age | Age at time of discharge. EHR progress notes | age | Integer values |
| Gender | EHR patient demographics data. | gender | 1 = Male  0 = Female |
| Race | EHR patient demographics data. | race | 0 = White/Caucasian  1 = Black/African American  2 = other/declined |
| Ethnicity | EHR patient demographics data. | ethnicity | 1 = Hispanic  0 = non-Hispanic |
| Marital Status | EHR patient demographics data. | marriedYN | 1 = Yes  0 = No |
| Lives Alone | EHR social history documentation. | livesaloneYN | 1 = Yes  0 = No |
| Language | EHR patient demographics data for self-reported preferred language. | language | 0 = English  1 = Spanish  2 = Other |
| Interpreter | EHR patient demographics data for interpreter preference. | interpreter | 1 = Yes  0 = No |
| Current smoker | Positive smoking status around period of index admission. EHR social history documentation. | smokesYN | 1 = yes  0 = no |
| Alcohol abuse | EHR social history documentation. | alcoholYN | 1 = yes  0 = no |
| Substance Abuse | EHR social history documentation. | substanceYN | 1 = yes  0 = no |
| **Comorbidities** | EHR patient health history, provider notes, and TCM outreaches. |  |  |
| Dementia | Presence of dementia | dementiaYN | 1 = yes  0 = no |
| Hypertension | Presence of hypertension | htnYN | 1 = yes  0 = no |
| Diabetes | Presence of diabetes | dmYN | 1 = yes  0 = no |
| Stroke | History of cerebrovascular accident | strokeYN | 1 = yes  0 = no |
| Cancer | Active of history of cancer | cancerYN | 1 = yes  0 = no |
| Coronary Artery Disease | Presence of coronary artery disease | cadYN | 1 = yes  0 = no |
| Peripheral Vascular Disease | Presence of peripheral vascular disease | pvdYN | 1 = yes  0 = no |
| Atrial fibrillation | Presence of atrial fibrillation | afibYN | 1 = yes  0 = no |
| Asthma | Presence of asthma | asthmaYN | 1 = yes  0 = no |
| COPD | Presence of chronic obstructive pulmonary disease | copdYN | 1 = yes  0 = no |
| Chronic Kidney Disease | Presence of chronic kidney disease | ckdYN | 1 = yes  0 = no |
| Liver Disease | Presence of liver disease | liverdxYN | 1 = yes  0 = no |
| Anemia | Presence of anemia | anemiaYN | 1 = yes  0 = no |
| Osteoarthritis | Presence of osteoarthritis | oaYN | 1 = yes  0 = no |
| Depression | Presence of depressive disorder | depressionYN | 1 = yes  0 = no |
| Anxiety | Presence of anxiety disorder | anxietyYN | 1 = yes  0 = no |
| 7-day follow-up | Follow-up with cardiology within 7 days of discharge. EHR encounters data. | dayfuYN | 1 = Yes  0 = No |
| APP contact within 48 hours | Contact by a physician assistant, nurse practitioner, or physician within 48 hours of discharge. TCM outreach notes. | APPcontact48hYN | 1 = Yes  0 = No |
| Contacted by TCM team | One or more successful TCM outreach vs no successful outreach determined via TCM outreach notes | contact | 1 = Yes  0 = No |
| Days to contact | Number of days til TCM outreach from date of discharge calculated by date of TCM outreach – date of discharge | Days_to_contact | Continuous |
| Number of APP outreaches | Total number of TCM calls to patient. TCM outreach notes. | num_outreaches | Continuous |
| Remote Patient Monitoring | Patient enrolled and participating in RPM program. TCM outreach notes. | rpmYN | 1 = Yes  0 = No |
| Community Paramedicine | ≥ 1 paramedic visit following discharge. Paramedic visitation records | paracaresYN | 1 = Yes  0 = No |
| Home Health Service | Patient receiving home health aide. TCM outreach notes. | hhsYN | 1 = Yes  0 = No |
| 30-day readmission | Hospital encounter within 30 days of discharge. EHR encounters data. | readmit30YN | 1 = Yes  0 = No |

| eTable 2. Missing Data From a Total Sample of n=343 | | | | |
| --- | --- | --- | --- | --- |
| Variable | Number of observations | Number of missing | Minimum value | Maximum value |
| Number of APP outreaches | 342 | 1 | 0 | 45 |
| RPM* | 342 | 1 | 0 | 1 |
| 7 day follow up | 338 | 5 | 0 | 1 |
| Current smoker | 342 | 1 | 0 | 1 |
| Alcohol abuse | 342 | 1 | 0 | 1 |
| Days to contact | 330 | 13 | 1 | 25 |

Note. APP=advanced practice provider; RPM=Remote Patient Monitoring

| eTable 3. Patient and Program Correlates of 30-day Readmissions – Full Model (n=338) | | | | |
| --- | --- | --- | --- | --- |
|  | Odds ratio | SE | 95% CI | *p*-value |
| Age | 1.03 | 0.02 | 1.0, 1.06 | 0.07 |
| Multimorbidity | 1.35 | 0.1 | 1.16, 1.56 | <0.001 |
| HHS | 0.50 | 0.17 | 0.25, 0.99 | 0.05 |
| APP contact within 48 hours | 1.50 | 0.48 | 0.8, 2.78 | 0.21 |
| ContactedYN | 0.18 | 0.12 | 0.05, 0.69 | 0.01 |
| 7-day follow-up | 0.41 | 0.13 | 0.22, 0.77 | 0.006 |
| Community Paramedicine | 1.32 | 0.44 | 0.69, 2.52 | 0.40 |
| MarriedYN | 0.74 | 0.27 | 0.37, 1.51 | 0.42 |
| LivesaloneYN | 1.37 | 0.49 | 0.68, 2.76 | 0.38 |
| Race | 0.87 | 0.23 | 0.52, 1.46 | 0.60 |
| Ethnicity | 0.96 | 0.04 | 0.44, 2.10 | 0.91 |

Note. SE= standard error; HHS=home health service; APP=Advanced Practice Provider

| eTable 4. Patient and Program Correlates of 30-day Readmissions Including Contact Timing Categories (n=338) | | | | |
| --- | --- | --- | --- | --- |
|  | Odds ratio | SE | 95% CI | *p*-value |
| Age | 1.03 | 0.02 | 1.0, 1.06 | 0.08 |
| Multimorbidity | 1.36 | 0.1 | 1.18, 1.58 | <0.001 |
| HHS | 0.53 | 0.18 | 0.27, 1.04 | 0.07 |
| APP contact within 48 hours | 1.44 | 0.46 | 0.77, 2.69 | 0.25 |
| 7-day follow-up | 0.37 | 0.12 | 0.20, 0.69 | 0.002 |
| Community Paramedicine | 1.27 | 0.42 | 0.67, 2.42 | 0.46 |
| Contact timing  Contacted within 48 hour  Contacted >48 hour | 0.21  0.13 | 0.14  0.10 | 0.06, 0.77  0.03, 0.60 | 0.02  0.009 |

Note. SE= standard error; HHS=home health service; APP=Advanced Practice Provider

**APPENDIX B. Simplified Model Including Contact Timing Categories**

A simplified model including a 3-level variable for contact timing indicated multimorbidity, 7-day ambulatory follow-up, and contact with the TCM team were significantly associated with reduced 30-day readmissions. For each point increase in multimorbidity, there was a 36% increased risk for readmission. Ambulatory follow up within 7 days of hospital discharge was associated with a 63% reduced risk for readmission (p=0.002, CI 0.20, 0.69). For the contact timing variable, no contact with the TCM team was the reference category and contacted within 48 hours and outside of 48 hours were the other two categories. The model showed contact with the TCM team was associated with significant reduction in readmission risk compared to no contact with the TCM team but timing of contact was less important.

| eTable 5. Cox Model for Time to Readmission (n=63) | | | |
| --- | --- | --- | --- |
|  | β | 95% CI | *p*-value |
| Age | 1.0 | 0.97, 1.03 | 0.88 |
| Comorbidities | 0.98 | 0.84, 1.14 | 0.77 |
| Home health services | 0.76 | 0.39, 1.46 | 0.41 |
| 7-day follow-up | 0.74 | 0.42, 1.31 | 0.31 |
| Community Paramedicine | 1.16 | 0.60, 2.24 | 0.67 |
| APP contact within 48 hours | 1.23 | 0.66, 2.29 | 0.51 |
| Contacted vs not contacted | 0.73 | 0.25, 2.07 | 0.55 |

Note. CI=confidence Interval

| eTable 6. Descriptive Characteristics of Not Contacted (n=13) | |
| --- | --- |
| Variable | Value %(n)* |
| Age (years), median (IQR), range | 88 (73, 93) |
| Female | 69.2 (9) |
| Race  White/Caucasian  Black/African American  Other/declined | 76.9 (10)  15.4 (2)  7.7 (1) |
| Ethnicity,  Non-Hispanic  Hispanic | 84.6 (11)  7.7 (1) |
| Married | 23.1 (3) |
| Lives alone | 7.7 (1) |
| Comorbidities, median (IQR), range 2-9 | 6 (5, 8) |

Note. *Unless otherwise noted

**APPENDIX C. Factors Associated with Time to Readmission**

Given patients who were readmitted were less likely to interact with the TCM team in terms of contact with APPs, and participation in paramedicine and remote monitoring services, we ran a Cox Model to test which variables were significantly associated with time to readmission. The time variable was number of days to readmission defined as date of readmission – date of discharge. Failure was defined as readmission (readmit30YN=1). The model included 63 observations with 803 days at risk. The overall model was not statistically significant (Prob>χ2=0.898).

**APPENDIX D. Stata Code**

*Study goal: explore which patient and program level factors (e.g., timely contact, 7-day follow-up) are associated with reduced 30-day readmission.

*Bias consideration: patients not readmitted within 30 days may appear to have been contacted more simply because they survived longer, introducing immortal time bias; utilized logistic regression for exploratory purposes.

******RECODES*********

*Create global health variable

generate ghs= dementiaYN +htnYN +dmYN +cancerYN +cadYN +pvdYN +afibYN +asthmaYN +copdYN +ckdYN +liverdxYN +anemiaYN +oaYN +depressionYN+ anxietyYN

*dichotomous variable for contacted within 48 hours vs more than 48 hours

generate contact48dich=Days_to_Contact

recode contact48dich min/2=0 3/max=1

*create 3-level variable for not contacted, contacted within 48 hours, contacted in >48 hours

generate contact_timing_cat=.

replace contact_timing_cat=0 if CONTACTED==0

replace contact_timing_cat=1 if CONTACTED==1 & Days_to_Contact<=2

replace contact_timing_cat=2 if CONTACTED==1 & Days_to_Contact>=3

label define contact_timing_cat 0 "not contacted" 1" contacted within 48h" 2 "contacted >48 hour"

label values contact_timing_cat contact_timing_cat

*****END RECODES****************

*Statistical Models

*test for collinearity

regress age race ethnicity language gender marriedYN hhsYN APPcontact48hYN dayfuYN paracaresYN livesaloneYN ghs

vif

**rpm removed due to collinearity

*FULL MODEL

logistic readmit30YN age ghs hhsYN dayfuYN paracaresYN APPcontact48hYN CONTACTED marriedYN livesaloneYN race ethnicity

*Removed non-significant variables

*SIMPLIFIED MODEL

logistic readmit30YN age ghs hhsYN dayfuYN paracaresYN APPcontact48hYN CONTACTED

*Postestimation commands for goodness of fit, area under the curve

estat gof

*p=0.34

lroc

*0.7338

**Supplementary

*Model with contact timing categories

logistic readmit30YN age ghs hhsYN APPcontact48hYN dayfuYN paracaresYN i.contact_timing_cat

*Cox model

stset Days_to_Readmit, failure(readmit30YN==1)

stcox age ghs hhsYN dayfuYN paracaresYN APPcontact48hYN contacted
